# Supplementary material for: Effects of Hurricane Michael on Access to Care for Pregnant Women and Associated Pregnancy Outcomes
Source: PubMed Central journal article supplement (PMC7825524; doi:10.3390/ijerph18020390), 2021-01-06
Supplement: ijerph-18-00390-s001.pdf [file ijerph-18-00390-s001.pdf]

## Supplementary file

The keywords that were searched in the 2019 AtoZdatabases Healthcare Professionals database: “Allopathic & Osteopathic Physicians”, “Ambulatory Health Care Facilities # Clinic/Center # Medically Fragile Infants and Children Day Care”, “Clinic/Center # Ambulatory Family Planning Facility”, “Clinic/Center #Birthing”, “General Acute Care Hospital # Rural”, “Midwife”, “Nurse Practitioner #Family #Neonatal #Obstetrics & Gynecology #Women’s Health #Lactation Consultant #Neonatal Intensive Care”, “Registered Nurse #Lactation Consultant #Neonatal Intensive Care #Women’s Health Care”, and “Respiratory, Rehabilitative & Restorative Service Providers # Res # Neonatal/Pediatrics”.

Table S1 Changes in perinatal outcomes after Hurricane Michael by maternity care availability within Area A<sup>&</sup> (sensitivity analysis)

|                                  |                         | Univariate model                   |                                     |                         | Multivariate model <sup>*</sup>    |                                     |                         |
|----------------------------------|-------------------------|------------------------------------|-------------------------------------|-------------------------|------------------------------------|-------------------------------------|-------------------------|
|                                  |                         | Both clinic and hospital available | Either clinic or hospital available | None                    | Both clinic and hospital available | Either clinic or hospital available | None                    |
|                                  |                         | RR (95%CI) <sup>#</sup>            |                                     |                         | RR (95%CI) <sup>#</sup>            |                                     |                         |
| Low birth weight (LBW)           | After vs before         | 1.114<br>(0.956, 1.298)            | 1.214<br>(1.023, 1.441)             | 1.167<br>(0.942, 1.445) | 1.094<br>(0.935, 1.280)            | 1.213<br>(1.031, 1.428)             | 1.138<br>(0.932, 1.391) |
|                                  | p-value for interaction | -                                  | -                                   | 0.783                   | -                                  | -                                   | 0.710                   |
| Spontaneous preterm birth (SPTB) | After vs before         | 1.135<br>(0.881, 1.436)            | 0.973<br>(0.780, 1.185)             | 0.847<br>(0.677, 1.059) | 1.136<br>(0.865, 1.492)            | 0.956<br>(0.787, 1.161)             | 0.834<br>(0.663, 1.049) |
|                                  | p-value for interaction | -                                  | -                                   | 0.549                   | -                                  | -                                   | 0.461                   |
| Induced preterm birth (IPTB)     | After vs before         | 0.865<br>(0.618, 1.210)            | 1.129<br>(0.920, 1.384)             | 0.816<br>(0.643, 1.034) | 0.839<br>(0.608, 1.159)            | 1.112<br>(0.897, 1.378)             | 0.810<br>(0.634, 1.036) |
|                                  | p-value for interaction | -                                  | -                                   | 0.147                   | -                                  | -                                   | 0.168                   |
| Small for gestational age (SGA)  | After vs before         | 1.351<br>(1.142, 1.597)            | 1.037<br>(0.913, 1.177)             | 1.225<br>(1.019, 1.473) | 1.339<br>(1.085, 1.653)            | 1.030<br>(0.923, 1.151)             | 1.175<br>(0.993, 1.391) |
|                                  | p-value for interaction | -                                  | -                                   | 0.103                   | -                                  | -                                   | 0.140                   |
| C-section                        | After vs before         | 1.012<br>(0.912, 1.124)            | 1.012<br>(0.949, 1.079)             | 1.015<br>(0.906, 1.137) | 1.015<br>(0.907, 1.135)            | 1.013<br>(0.947, 1.084)             | 1.014<br>(0.903, 1.138) |
|                                  | p-value for interaction | -                                  | -                                   | 0.999                   | -                                  | -                                   | 0.999                   |
| No Breast-feeding                | After vs before         | 1.024<br>(0.986, 1.064)            | 0.953<br>(0.872, 1.042)             | 1.065<br>(0.959, 1.184) | 1.045<br>(0.977, 1.118)            | 0.935<br>(0.840, 1.040)             | 1.001<br>(0.885, 1.132) |
|                                  | p-value for interaction | -                                  | -                                   | 0.289                   | -                                  | -                                   | 0.307                   |

<sup>#</sup>RR: cumulative risk ratio, CI: confidence interval

<sup>\*</sup>LBW adjusting for: mother's education, age, ethnicity, whether in WIC program, and each zip-code area's total population, health insurance coverage, poverty percentage, urban/rural percentage, race and ethnicity percentage; PTB, SPTB, IPTB, SGA, C-section, breastfeeding adjusting for: mother's age, education, ethnicity, pre-pregnancy BMI, whether in WIC program, and each zip-code area's total population, health insurance coverage, poverty percentage, urban/rural percentage, race and ethnicity percentage

<sup>&</sup>Area A=FEMA individual; FEMA, Federal Emergency Management Agency
